# Supplementary material
Source: HighWire-hosted journal article supplement (https://erj.ersjournals.com/content/54/5/1900342)
Supplement: inline-supplementary-material-1 [file inline-supplementary-material-1.pdf]

## **Supplementary material**

### **Impaired right ventricular lusitropy is associated with ventilatory inefficiency in PAH**

Khodr Tello, Antonia Dalmer, Rebecca Vanderpool, Hossein A. Ghofrani, Robert Naeije, Fritz Roller, Werner Seeger, Daniel Dumitrescu, Natascha Sommer, Anne Brunst, Henning Gall and Manuel J. Richter

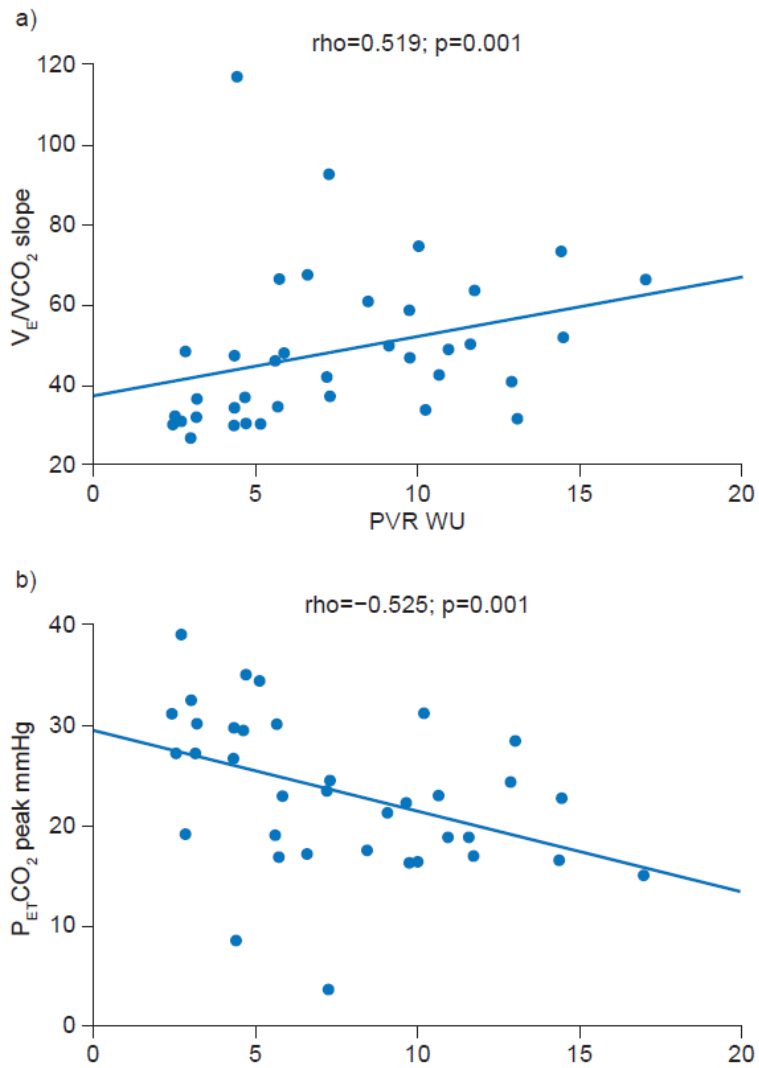

FIGURE E1 Correlation of PVR with a)  $V_E/VCO_2$  slope and b) peak  $P_{ET}CO_2$ .  $P_{ET}CO_2$ : end-tidal carbon dioxide; PVR: pulmonary vascular resistance;  $V_E/VCO_2$ : minute ventilation/carbon dioxide production (ventilatory equivalent for carbon dioxide); WU: Wood Units.

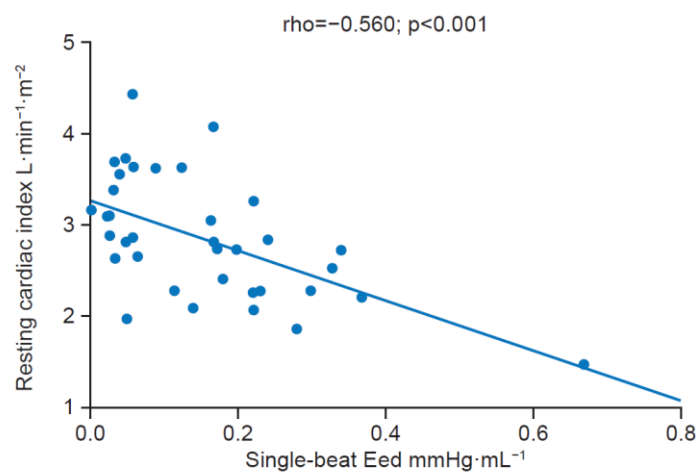

FIGURE E2 Correlation of single-beat Eed with cardiac index at rest. Eed: end-diastolic elastance.

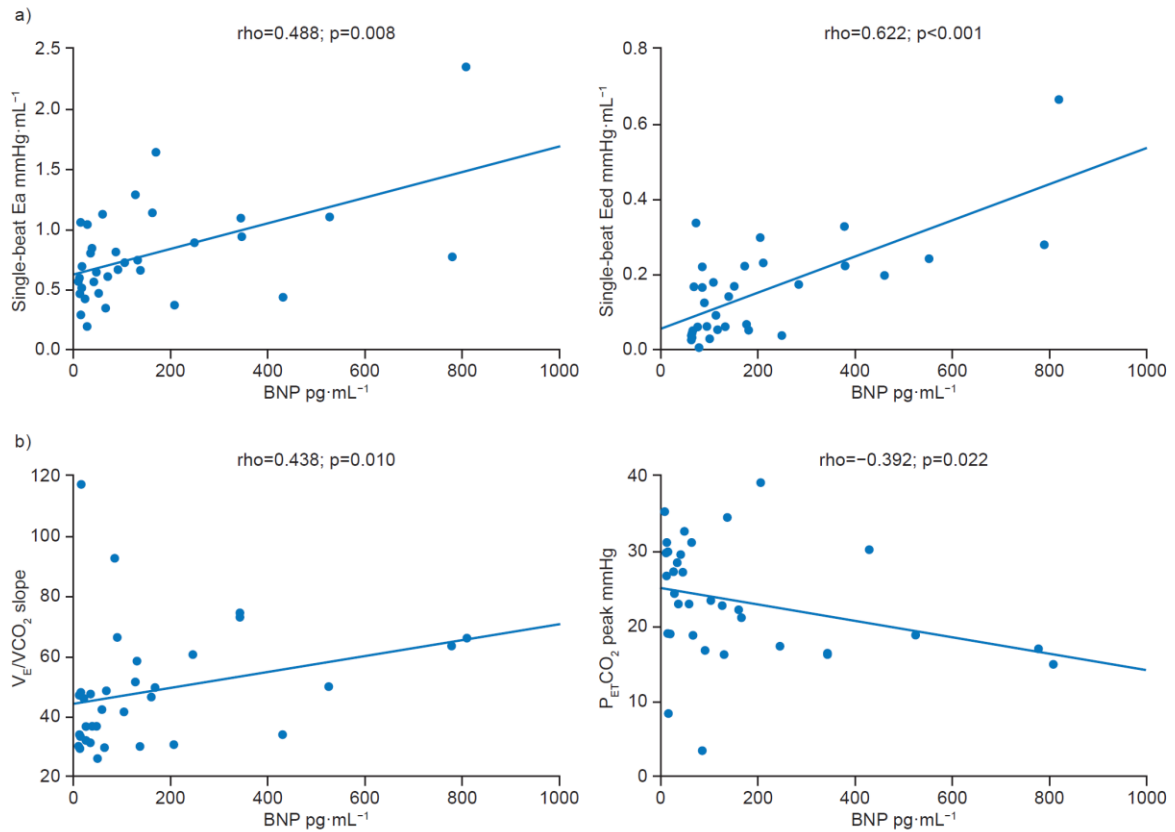

FIGURE E3 Correlation of BNP with a) single-beat Ea and Eed, and b) V<sub>E</sub>/VCO<sub>2</sub> slope and peak

P<sub>ET</sub>CO<sub>2</sub>. BNP: B-type natriuretic peptide; Ea: arterial elastance; Eed: end-diastolic elastance; P<sub>ET</sub>CO<sub>2</sub>: end-tidal carbon dioxide; V<sub>E</sub>/VCO<sub>2</sub>: minute ventilation/carbon dioxide production (ventilatory equivalent for carbon dioxide).
